# Supplementary material for: Induction of vacuolar invertase inhibitor mRNA in potato tubers contributes to cold-induced sweetening resistance and includes spliced hybrid mRNA variants
Source: PubMed Central journal article supplement — J Exp Bot. 2011 Mar 10;62(10):3519–34. doi: 10.1093/jxb/err043 (PMC3130176; doi:10.1093/jxb/err043), 2011-03-10
Supplement: supp_err043_00057414-file001.pdf [file supp_err043_00057414-file001.pdf]

Induction of vacuolar invertase inhibitor mRNA in potato tubers contributes to cold-induced sweetening resistance and includes spliced hybrid mRNA variants

David A. Brummell, Ronan K.Y. Chen, John C. Harris, Huaibi Zhang, Cyril Hamiaux, Andrew V. Kralicek, Marian J. McKenzie

**Table S1.** Primers used for PCR amplification and quantitative real-time PCR.

| Name              | Sequence (5'-3')                    |
|-------------------|-------------------------------------|
| INHdF             | AAGAACACACCIAAYTAYCA                |
| INHdR             | TCWCCWGAWGAWCCRACCAT                |
| INH2-O            | TGCTGAAGATGGTATGGATG                |
| INH2-I            | CTGAAGATGGTATGGATGATG               |
| INH2F             | CACCTTTAATAATATTCCATTAGC            |
| INH2R2            | GACACATCACAATAAATTTCTTAC            |
| INH1F2            | CCATCCATTTACTATATAAAACAC            |
| INH1R4            | ACACTTGTACAAATATTCATGATAC           |
| INH2R             | TTCTCAATCCTTTATATACAAACAC           |
| INH1R2            | TGTTATTCCCATTTGTTACTAG              |
| INH2F4            | CCCATATTGATGCTAATCACC               |
| INH2R4            | AACCTCGTTACTACGTGGATC               |
| INH1GFPF          | TATGAATTCAAATGAAAATTTTCATTTTCCTAATG |
| INH1GFPR          | TTTTGGATCCTGGTGTGTTCTTGCAATGTTG     |
| INH2GFPF          | TATGAATTCAAATGAGAAATTTATTCCCCATATTG |
| INH2GFPR          | TTTTGGATCCGGATTGTAGGGTGGTGAGACATAG  |
| INH1RTF           | AGAAGTGAAACAGCAGGAGAT               |
| INH1RTR           | GCTTCTATTGCTTCTGGCATA               |
| INH2RTF           | GCTGAAGATGGTATGGATGA                |
| INH2 $\alpha$ RTR | CTTCGTGCACTGAACTGTAA                |
| INH2 $\beta$ RTR  | ATCACCAGAAGAACCAACC                 |
| ActRTF            | TCCAAGGCCAACAGAG                    |
| ActRTR            | GCAAGGTCCAAACGAAGA                  |

For degenerate primers, Y = C or T, W = A or T, R = A or G, I = inosine
